# Supplementary material for: Effect of Long-Term Sodium Hypochlorite Cleaning on Silicon Carbide Ultrafiltration Membranes Prepared via Low-Pressure Chemical Vapor Deposition
Source: MDPI journal article supplement (doi:10.3390/membranes14010022), 2024-01-15
Supplement: s1 [file s1]

Supplementary Materials

# Effect of Long-Term Sodium Hypochlorite Cleaning on Silicon Carbide Ultrafiltration Membranes Prepared via Low-Pressure Chemical Vapor Deposition

Asif Jan <sup>1,\*</sup>, Mingliang Chen <sup>1,2</sup>, Michiel Nijboer <sup>2</sup>, Mieke Luiten-Olieman <sup>2</sup>, Luuk Cornelis Rietveld <sup>1</sup>  
and Sebastiaan Gerard Jozef Heijman <sup>1</sup>

<sup>1</sup> Section of Sanitary Engineering, Department of Water Management, Faculty of Civil Engineering and Geosciences, Delft University of Technology, Stevinweg 1, 2628 CN Delft, The Netherlands; m.chen-1@tudelft.nl (M.C.); l.c.rietveld@tudelft.nl (L.C.R.); s.g.j.heijman@tudelft.nl (S.G.J.H.)

<sup>2</sup> Inorganic Membranes, MESA + Institute for Nanotechnology, University of Twente, 7500 AE Enschede, The Netherlands; m.p.nijboer@utwente.nl (M.N.); m.w.j.luiten@utwente.nl (M.L.-O.)

\* Correspondence: a.jan@tudelft.nl

1. Thickness of SiC layer on silicon wafers at different deposition conditions measured by ellipsometry.

**Table S1.** SiC layer thickness as a function of different deposition conditions.

| S.No. | Temperature (°C) | Pressure (mTorr) | Time (mins) | SiC Thickness (nm) |
|-------|------------------|------------------|-------------|--------------------|
| 1.    | 750              | 600              | 60          | 16                 |
| 2.    | 860              | 100              | 30          | 16                 |

2. SiC-7-2A and SiC-8-2A membranes post-ageing.

## SiC-7-2A

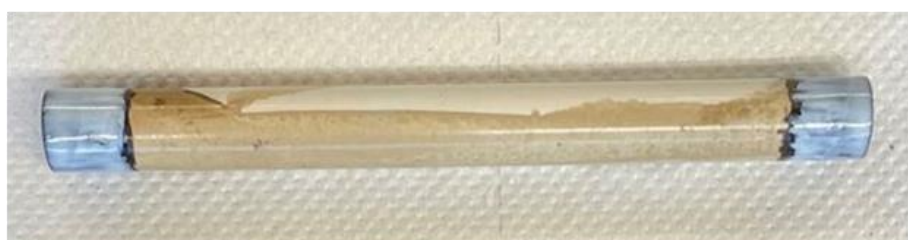

## SiC-8-2A

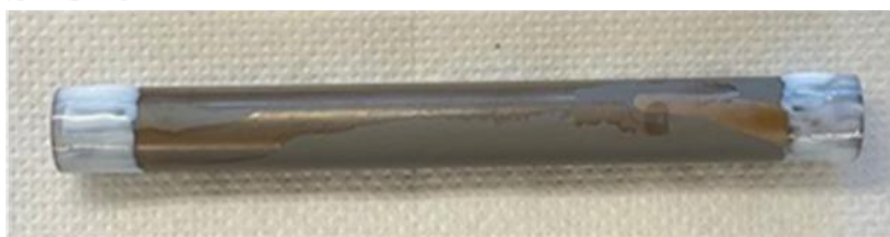

**Figure S1.** SiC membranes after ageing in NaClO for 200hrs.
